# Supplementary material for: CRISPR/cas Loci of Type II Propionibacterium acnes Confer Immunity against Acquisition of Mobile Elements Present in Type I P. acnes
Source: PLOS journal article supplement (doi:10.1371/journal.pone.0034171), 2012-03-30

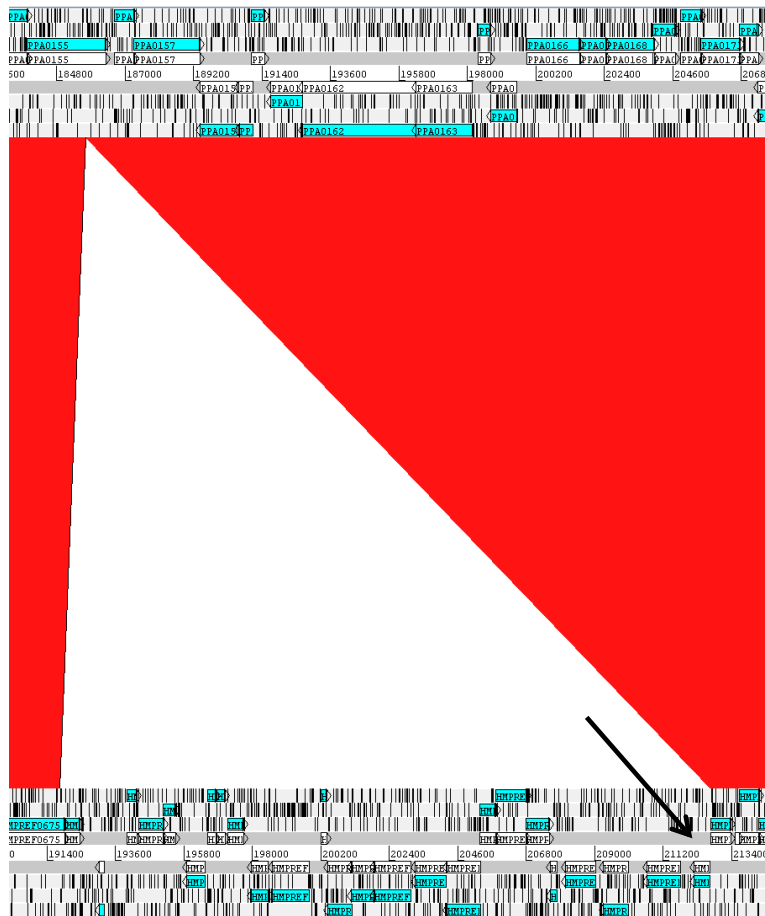

**Figure S1. Bacteriocin island in *P. acnes* strain SK137**

The spacer sequence can be found in the 3' end of the island (black arrow). The island contains a gene cluster for bacteriocin synthesis. Several genes are homologous to the Sag gene cluster for streptolysin S synthesis in *Streptococcus pyogenes*. SagD is a scaffold or docking protein, SagC is a cyclodehydratase and SagB participates in the maturation of streptolysin S from a ribosomally produced precursor polypeptide. The Abi genes are probably involved in self-immunity. The cluster is inserted into the backbone genome, within a gene encoding a ATP-dependent helicase (PPA0155 in KPA, upper genome).

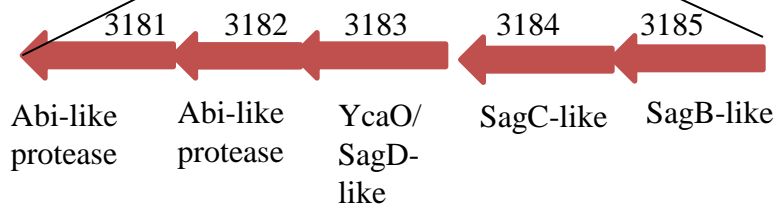

Supplement: S1 (10.1371/journal.pone.0034171.s001) [file journal.pone.0034171.s001]
